# Supplementary material
Source: HighWire-hosted journal article supplement (http://dmd.aspetjournals.org/highwire/filestream/79744/field_highwire_adjunct_files/0/929_supp_table.pdf)
Supplement: 929_supp_table.pdf [file 929_supp_table.pdf]

Supplemental Table 1. Four day multiple-dose pharmacokinetics of endoxifen in rats

| Dose (mg/kg)<br>P.O.       | 20       | 40         | 60         | 100        | 200        |
|----------------------------|----------|------------|------------|------------|------------|
| C <sub>Day 1</sub> (ng/mL) | 360 ± 30 | 1110 ± 270 | 990 ± 150  | 1270 ± 360 | 1290 ± 280 |
| C <sub>Day 2</sub> (ng/mL) | 390 ± 50 | 1330 ± 60  | 1230 ± 170 | 2020 ± 370 | 3350 ± 500 |
| Accumulation Ratio         | 1.10     | 1.19       | 1.25       | 1.60       | 2.60       |
| Predicted Half-Life (h)    | 7.0      | 9.1        | 10.3       | 16.9       | 34.2       |
